# Supplementary material for: NMR-Based Plasma Metabolomics at Set Intervals in Newborn Dairy Calves with Severe Sepsis
Source: Hindawi journal article supplement (doi:10.1155/2018/8016510), 2018-01-01
Supplement: f1 [file 8016510.f1.pdf]

**Supplemental Table 1** Blood gas analysis.

| Parameters                   | Healthy animals<br>(n=10) | Diseased animals<br>(Hours) |              |              |             |              |              | P value |
|------------------------------|---------------------------|-----------------------------|--------------|--------------|-------------|--------------|--------------|---------|
|                              |                           | 0 (n:20)                    | 3. (n:20)    | 6 (n:20)     | 24 (n:17)   | 48 (n:14)    | 72 (n:12)    |         |
| Ph                           | 7.38±0.00a                | 7.00±0.03b                  | 7.27±0.7b    | 7.28±0.01a   | 7.29±0.01a  | 7.28±0.02a   | 7.31±0.02a   | <0.001  |
| PCO <sub>2</sub> , mmHg      | 44.20±1.10                | 51.50±2.59                  | 47.85±7.59   | 47.35±1.28   | 51.64±1.65  | 49.64±1.31   | 50.41±2.49   |         |
| PO <sub>2</sub> , mmHg       | 32.50±0.6a                | 26.35±1.9ab                 | 31.55±9.18ab | 26.75±2.25ab | 24.05±1.48b | 23.07±1.78b  | 22.25±1.89b  | 0.29    |
| HCO <sub>3</sub> , mol/L     | 27.99±1.37a               | 13.61±1.34c                 | 7.27±0.7b    | 22.66±0.99b  | 25±0.90ab   | 23.67±1.22ab | 25.60±1.30ab | <0.001  |
| BE, mol/L                    | 4.14±0.61a                | -17.36±1.74c                | 47.85±7.59   | -4.02±1.13b  | -1.92±1.01b | -3.23±1.47b  | -0.95±1.44ab | <0.001  |
| O <sub>2</sub> saturation, % | 70.30±1.24a               | 24.05±4.27b                 | 48.70±19.18b | 39.75±4.70b  | 35.29±3.97b | 32.57±4.30b  | 32.25±4.27b  | <0.001  |

**Supplemental Table 2** Complete blood count analysis.

| Parameters                        | Healthy animals<br>(n=10) | Diseased animals<br>(Hours) |              |              |              |              |              | P value |
|-----------------------------------|---------------------------|-----------------------------|--------------|--------------|--------------|--------------|--------------|---------|
|                                   |                           | 0 (n:20)                    | 3. (n:20)    | 6 (n:20)     | 24 (n:17)    | 48 (n:14)    | 72 (n:12)    |         |
| WBCs, 10 <sup>3</sup> /μL         | 8.94d                     | 17.82a                      | 13.13±8.79ab | 13.99ab      | 14.69a       | 11.72bc      | 11.18bcd     | <0.003  |
| Lymphocytes, 10 <sup>3</sup> /μL  | 2,34ab                    | 3,70a                       | 3,79a        | 2,30b        | 2,80ab       | 2,99ab       | 3,59ab       | >0.05   |
| Monocytes, 10 <sup>3</sup> /μL    | 0.34±0.03b                | 0.61±0.07a                  | 0.40±0.15ab  | 0.39±0.04ab  | 0.53±0.05ab  | 0.43±0.06ab  | 0.54±0.06ab  | >0.05   |
| Granulocytes, 10 <sup>3</sup> /μL | 2.66±0.17c                | 15.75±2.13a                 | 8.93±7.29ab  | 11.65±1.81ab | 11.94±1.36ab | 8.19±1.25bc  | 8.26±1.52bc  | <0.015  |
| RBCs, 10 <sup>6</sup> /μL         | 8.00±0.40ab               | 10.12±0.50a                 | 7.44±1.95b   | 7.72±0.47b   | 8.59±0.51ab  | 8.45±0.49ab  | 8.19±0.50ab  | <0.008  |
| MCV, fl                           | 33.36±1.21b               | 38.16±0.80a                 | 37.48±3.58a  | 37.60±0.82a  | 37.55±0.85a  | 36.92±0.76a  | 37.20±0.90a  | <0.020  |
| PCV, %                            | 27.03±2.16b               | 38.86±2.34a                 | 28.14±8.88b  | 29.33±2.14ab | 32.50±2.32ab | 31.27±2.08ab | 30.50±2.19ab | <0.009  |
| MCH, pg                           | 12.62±0.43                | 12.83±0.25                  | 12.53±1.21   | 13.00±0.41   | 12.41±0.37   | 12.70±0.28   | 12.42±0.24   | >0.05   |
| MCHC, g/dl                        | 38.08±0.35a               | 33.86±0.54b                 | 33.68±2.74b  | 34.74±0.65b  | 33.38±0.99b  | 34.65±0.78b  | 33.66±0.72b  | <0.003  |
| Hb, g/dl                          | 10.29±0.81                | 13.12±0.76                  | 9.43±2.84b   | 10.17±0.73   | 10.78±0.74   | 10.76±0.70   | 10.21±0.68   | <0.031  |

**Supplemental Table 3** Biochemical profile.

| Parameters       | Healthy animals<br>(n=10) | Diseased animals<br>(Hours) |               |             |             |             |              | P value |
|------------------|---------------------------|-----------------------------|---------------|-------------|-------------|-------------|--------------|---------|
|                  |                           | 0 (n:20)                    | 3 (n:20)      | 6 (n:20)    | 24 (n:17)   | 48 (n:14)   | 72 (n:12)    |         |
| BUN, mg/dL       | 8.90±1.37b                | 54.55±5.92a                 | 51.80±27.44a  | 48.25±4.93a | 45.29±4.46a | 44.64±5.99a | 48.25±8.18a  | <0.001  |
| Creatinine, g/dL | 1.14±0.08b                | 3.99±0.57a                  | 3.74±2.30a    | 3.50±0.52a  | 2.82±0.53ab | 2.57±0.41ab | 2.54±0.49ab  | 0.014   |
| AST, IU/L        | 48.50±3.42b               | 134.4±19.9ab                | 152.8±111.4ab | 195.3±24.8a | 242.6±30.1a | 208±30.59a  | 207.8±25.6a  | <0.001  |
| ALT, IU/L        | 12,50c                    | 38,00b                      | 29,5b         | 39,50ab     | 76,00a      | 80,5a       | 75,50a       | 0.002   |
| ALP, IU/L        | 484±68.51                 | 609.2±74.1                  | 450±257       | 488.4±57.01 | 475.5±54.8  | 444.4±40.4  | 403.6±39.9   |         |
| GGT, IU/L        | 62,50a                    | 66,00a                      | 46a           | 44,00a      | 54,00a      | 101,00a     | 54,00a       |         |
| Protein, g/dL    | 6.16±0.23 a               | 5.64±0.37 a                 | 4.01±0.82c    | 4.24±0.21b  | 4.93±0.25ab | 5.25±0.29ab | 5.09±0.22 ab | 0.001   |
| Albumin, /dL     | 3.46±0.10 ab              | 3.58±0.14a                  | 2.59±0.37c    | 2.72±0.08c  | 3.07±0.09bc | 3.25±0.10ab | 3.27±0.10ab  | <0.001  |
| Na, mmol/L       | 146.20±0.92c              | 142.40±1.97c                | 150.7±7.94bc  | 151.8±1.5bc | 160±2.22ab  | 160.4±2.6ab | 162.2±4.3a   | <0.001  |
| K, mmol/L        | 3.95±0.10b                | 6.25±0.31a                  | 5.24±1.14ab   | 4.51±0.25b  | 4.20±0.26b  | 4.49±0.29b  | 4.75±0.23b   | <0.001  |
| Lactate, mmol/L  | 1.16±0.15b                | 5.31±0.99a                  | 6.78±5.13a    | 5.95±1.06a  | 3.31±0.58ab | 2.77±0.54ab | 2.70±0.68ab  | 0.002   |

**Supplemental Table 4** An integrated analysis based on Metaboanalyst software: view of contributing pathways.

| Pathway Name                                | P-value                   | Holm P-value              | FDR                       |
|---------------------------------------------|---------------------------|---------------------------|---------------------------|
| Aminoacyl-tRNA biosynthesis                 | 6.4289 x 10 <sup>-9</sup> | 5.1431 x 10 <sup>-7</sup> | 5.1431 x 10 <sup>-7</sup> |
| Valine, leucine and isoleucine biosynthesis | 2.0877 x 10 <sup>-5</sup> | 0.0016493                 | 8.3509 x 10 <sup>-4</sup> |
| Nitrogen metabolism                         | 9.3233 x 10 <sup>-5</sup> | 0.0072722                 | 0.0024862                 |
| Glycine, serine and threonine metabolism    | 2.127 x 10 <sup>-4</sup>  | 0.016378                  | 0.0042541                 |
| Synthesis and degradation of ketone bodies  | 6.1204 x 10 <sup>-4</sup> | 0.0097926                 | 0.0097926                 |
